# Supplementary material
Source: ML conference proceedings conference paper supplement (https://proceedings.mlr.press/v139/chung21a.html)
Supplement: Supplementary file 1 [file chung21a-supp.zip]

Archive with 2 entries (2 files):
- 3-armed_bandit.py
- appendix.pdf
